# Supplementary material for: Tumor response and endogenous immune reactivity after administration of HER2 CAR T cells in a child with metastatic rhabdomyosarcoma
Source: Nat Commun. 2020 Jul 15;11:3549. doi: 10.1038/s41467-020-17175-8 (PMC7363864; doi:10.1038/s41467-020-17175-8)
Supplement: Supplementary file 1 — Supplementary Information [file 41467_2020_17175_MOESM1_ESM.pdf]

## **Supplementary Information**

### **Tumor response and endogenous immune reactivity after administration of HER2 CAR T cells in a child with metastatic rhabdomyosarcoma**

**Hegde M et al**

## **Supplementary Appendix**

### **Table of Contents**

#### **Supplementary Figures**

|                        |         |
|------------------------|---------|
| Supplementary Figure 1 | page 3  |
| Supplementary Figure 2 | page 5  |
| Supplementary Figure 3 | page 6  |
| Supplementary Figure 4 | page 7  |
| Supplementary Figure 5 | page 8  |
| Supplementary Figure 6 | page 11 |
| Supplementary Figure 7 | page 12 |

#### **Supplementary Tables**

|                        |         |
|------------------------|---------|
| Supplementary Table 1  | page 13 |
| Supplementary Table 2  | page 14 |
| Supplementary Table 3  | page 15 |
| Supplementary Table 4A | page 16 |
| Supplementary Table 4B | page 17 |
| Supplementary Table 4C | page 19 |
| Supplementary Table 5A | page 20 |
| Supplementary Table 5B | page 21 |
| Supplementary Table 6  | page 22 |
| Supplementary Table 7  | page 24 |

|                                 |         |
|---------------------------------|---------|
| <b>Supplementary References</b> | page 25 |
|---------------------------------|---------|

# Supplementary Figures

**A.**

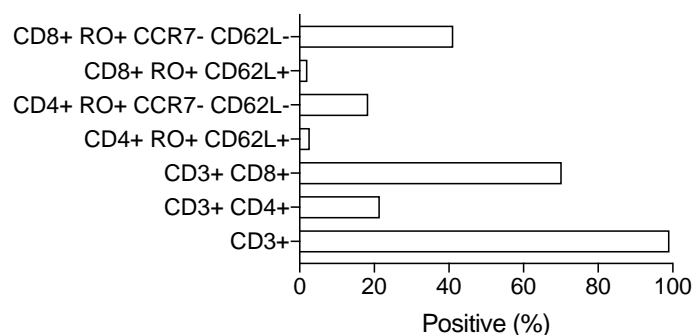

**B.**

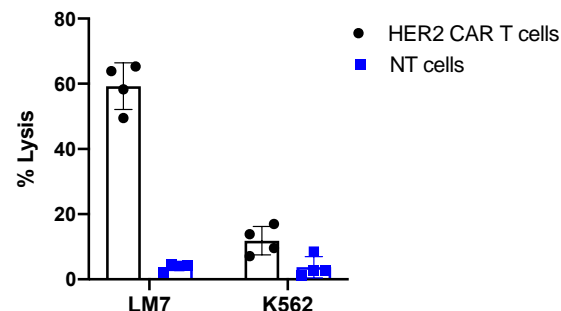

**C.**

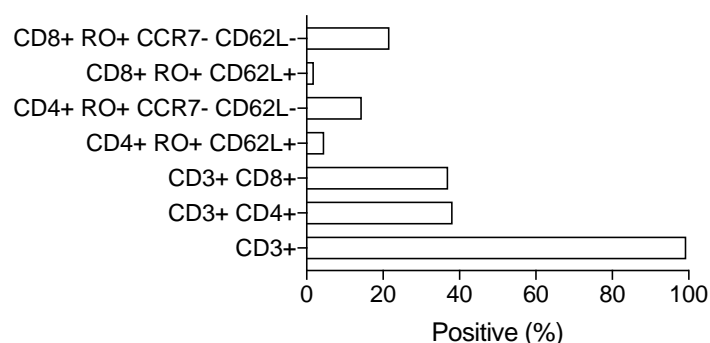

**D.**

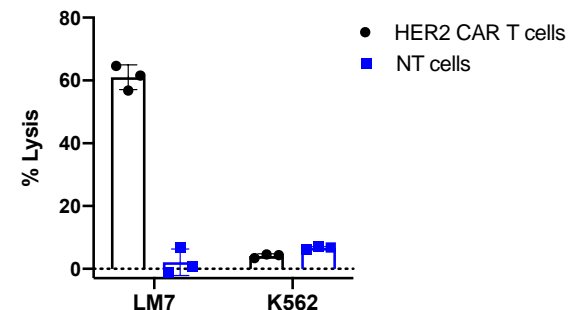

## Supplementary Figure 1: Characterization of the autologous HER2 CAR T-cell products. (A)

Component analysis and phenotype of the first cellular product. The cells were predominantly CD8+ T-cell subsets with effector memory phenotype. (B) Cytolytic activity of the HER2 CAR T cells (first product) against HER2-positive (LM7) and HER2-negative (K562) tumor targets. Non-transduced (NT) T cells were used as controls in 4-hour chromium-51 release assay; n=4 technical replicates, data are presented as mean values +/- SD. (C) Component analysis and phenotype of the second HER2 CAR T-cell product. The second product contained a higher proportion of CD4+ T cells with predominantly effector memory phenotype. (D) Cytolytic activity of the HER2-CAR T cells (second product) against HER2-positive (LM7) and HER2-negative (K562) tumor targets; n=3 technical replicates, data are

presented as mean values  $\pm$  SD. Manufactured CAR T-cell product is tested for cytolytic activity using two HER2-positive and two HER2-negative tumor cell lines at 4 effector to target ratios (5:1, 10:1, 20:1, 40:1). Representative graphs in panel (B) and (D) depict the cytolytic activity against one HER2-positive and one HER2-negative tumor target at 20:1 effector to target ratio. CAR T-cell product component analysis is done using a standard flow cytometry panel developed in the Good Manufacturing Practice (GMP) Facility at Texas Children's Hospital.

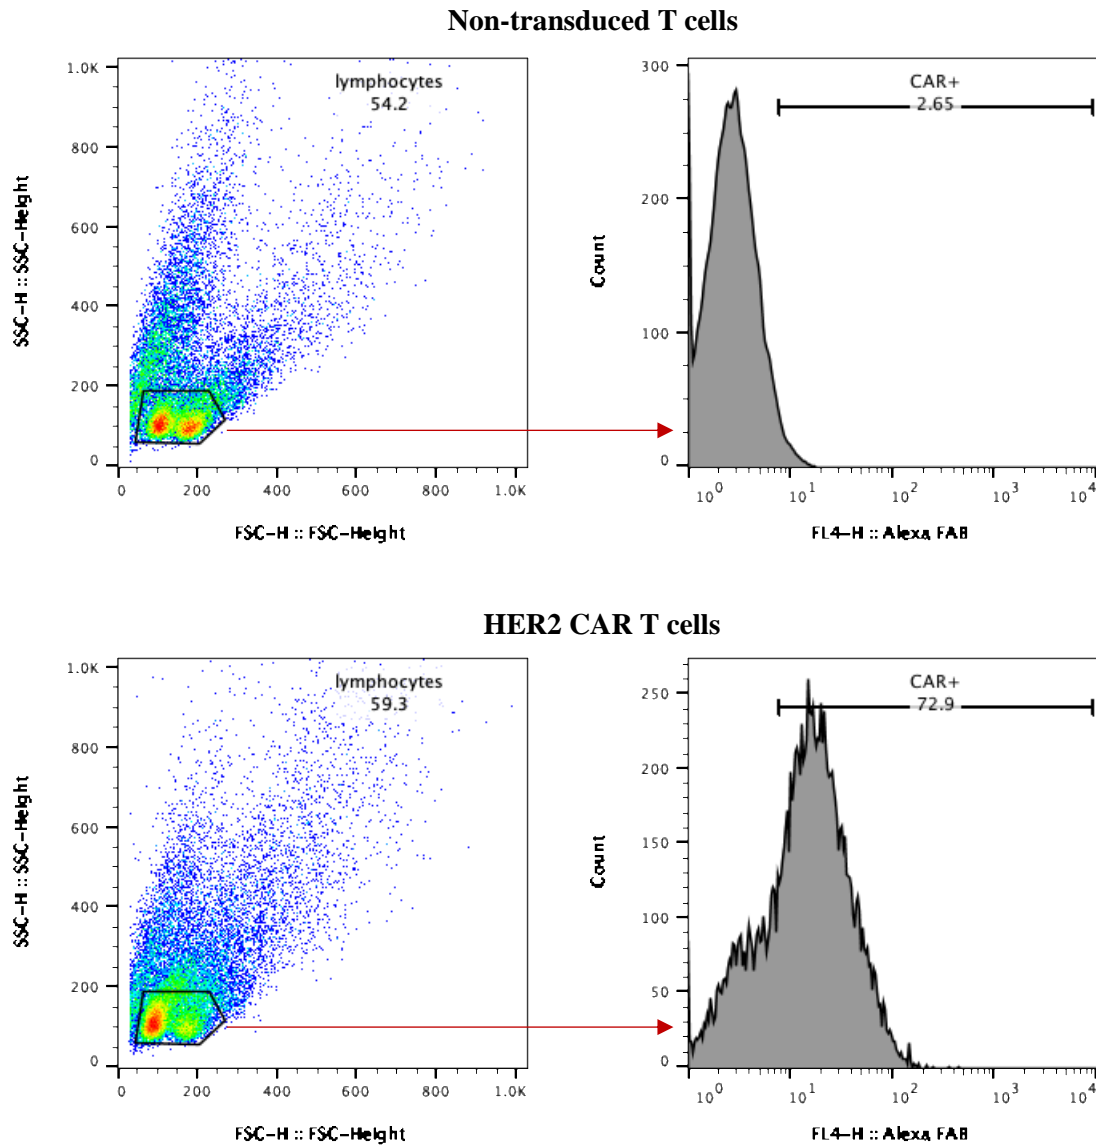

**Supplementary Figure 2: Gating strategy for HER2 CAR transduction on T cells shown in Figure 1F.** Flow cytometry was performed on the patient's T cells at approximately one week after retroviral CAR transduction and repeated prior to product freezing. Histograms shown are representative data. Lower panel demonstrates the gating strategy for evaluating the HER2 CAR expression on patient's T cells in comparison to non-transduced T cells which is shown in the upper panel.

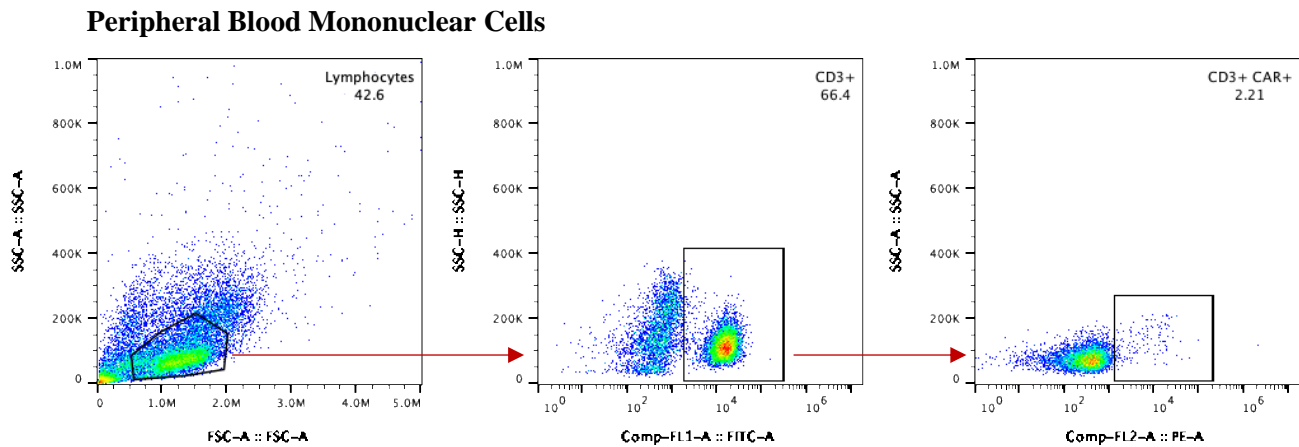

**Supplementary Figure 3: Gating strategy for detection of HER2 CAR T cells in the peripheral blood using flow cytometry shown in Figures 3D and 3E.** Flow cytometry was performed on patient's peripheral blood mononuclear cells (PBMC) at 7 days after the CAR T-cell infusion. HER2 CAR expressing T cells were detected using a recombinant ErbB2/HER2 Fc chimeric protein followed by a goat anti-human IgG Fc secondary antibody as described in methods section of the manuscript. The assessment of the peripheral blood was repeated for each CAR T cell infusion given after lymphodepletion. Representative dot plots are shown here to demonstrate the gating strategy used.

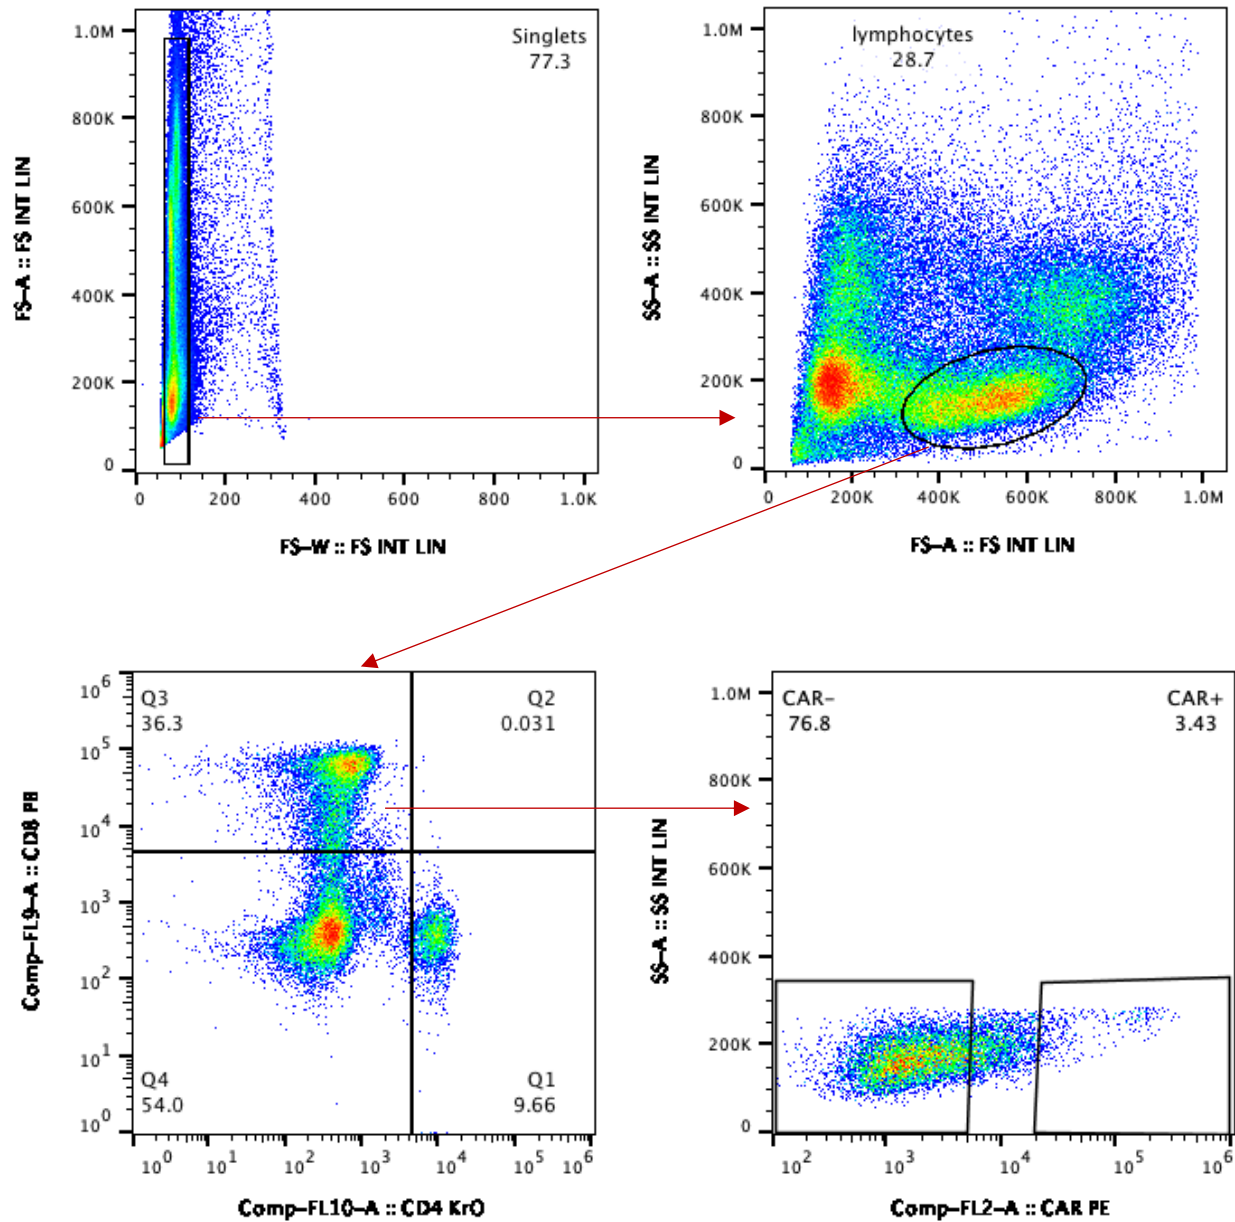

**Supplementary Figure 4: Gating strategy for analysis of PD1 and LAG3 surface expression on peripheral blood CD8<sup>+</sup> T cells shown in Figures 3F and 3G.** Flow cytometry was performed on peripheral blood at 7 days after the HER2 CAR T-cell infusion to evaluate the surface expression of PD1 and LAG3 on CD8<sup>+</sup> T cells as described in manuscript methods. Representative dot plots shown here depict the gating strategy used for analysis.

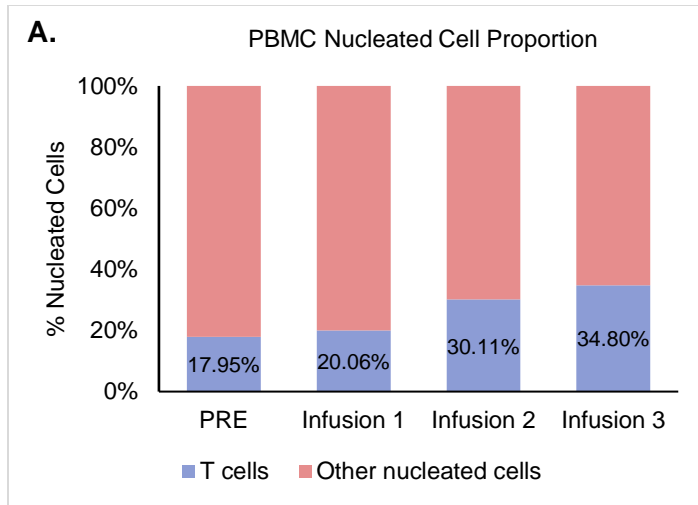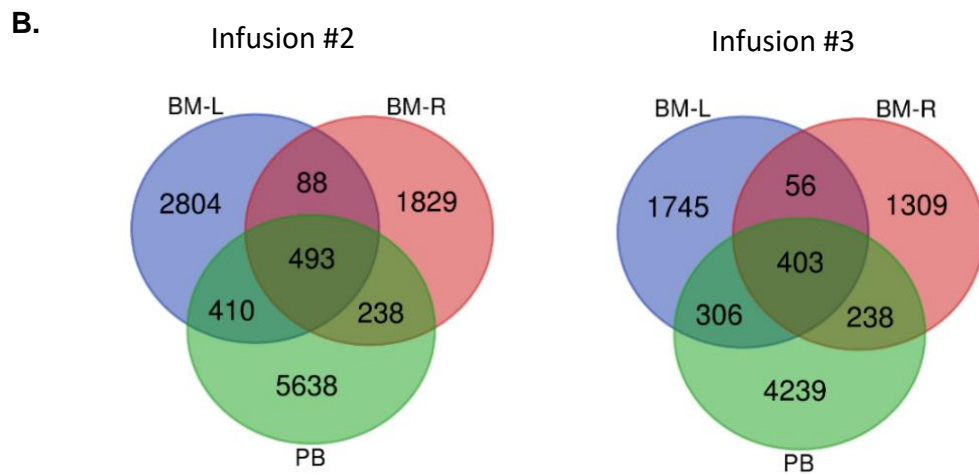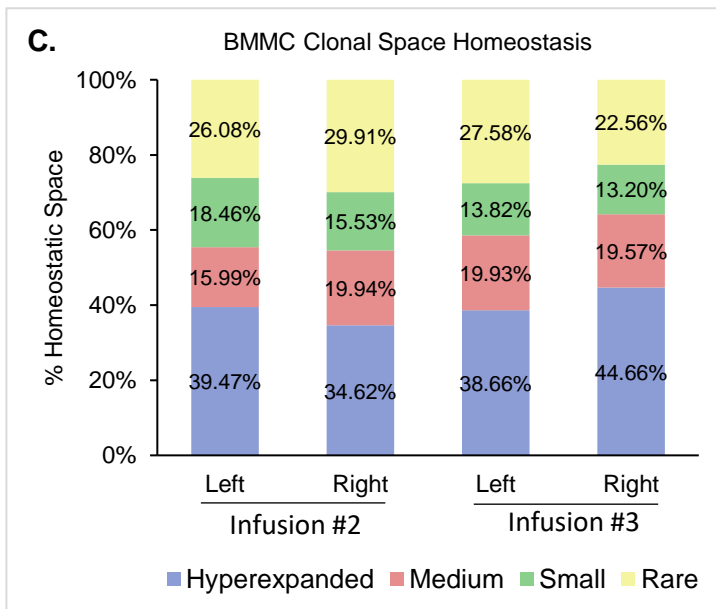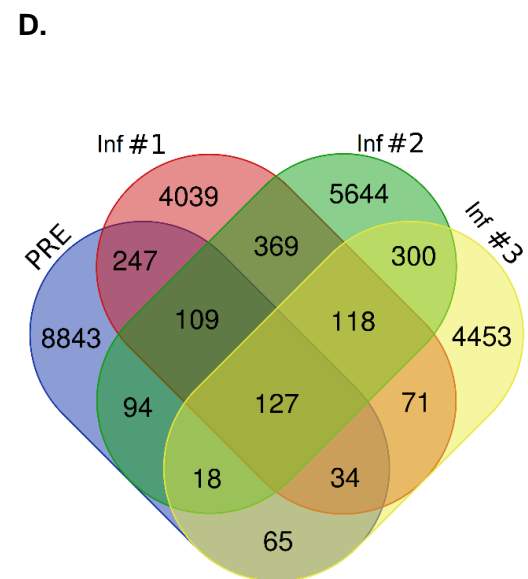

E.

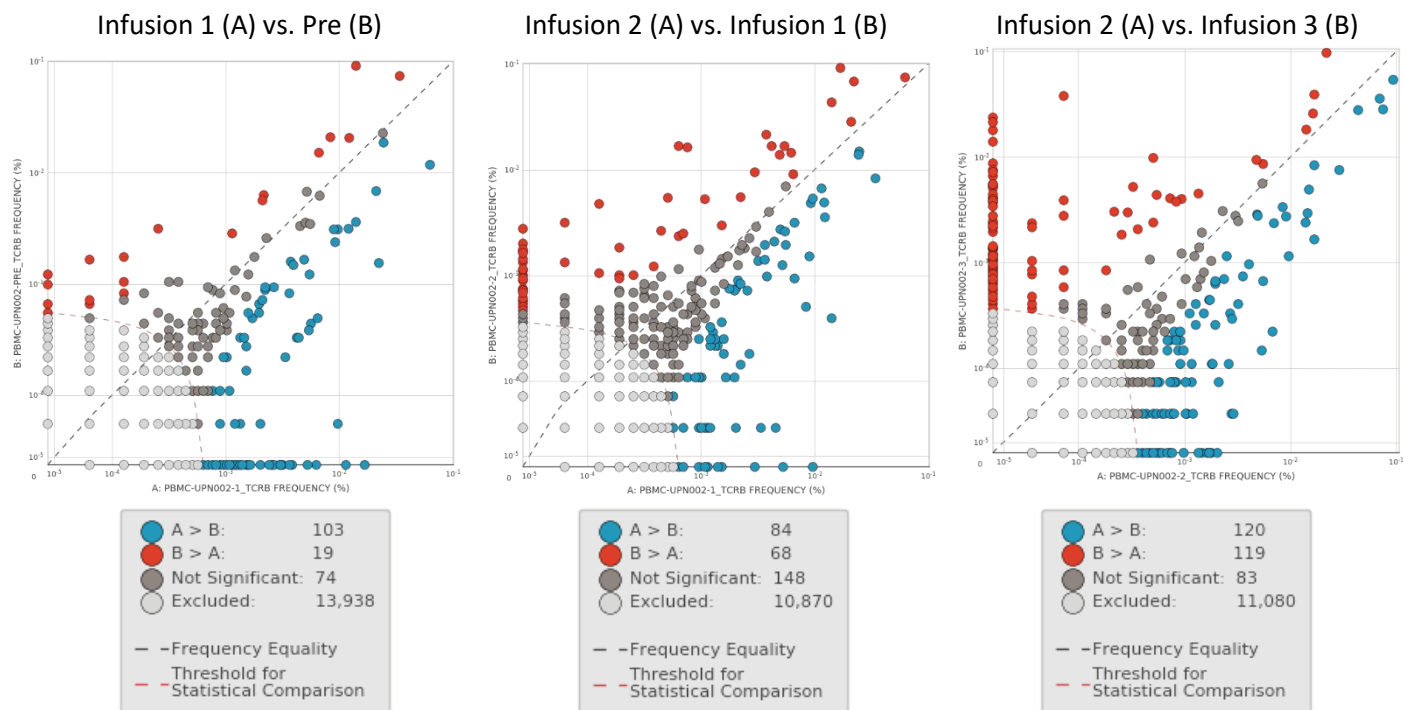

**Supplementary Figure 5: Longitudinal tracking of T-cell clones in the peripheral blood and bone marrow during TCR $\beta$  repertoire remodeling.** (A) Longitudinal tracking of the proportion of nucleated cells in the peripheral blood before and after HER2 CAR T-cell infusions. PBMC, peripheral blood mononuclear cells. (B) Venn diagram representing the unique TCR $\beta$  CDR3 rearrangements (amino acids) between the bone marrow (BM) metastatic sites and peripheral blood (PB) after the second and third CAR T-cell infusions. L, Left. R, Right. (C) Homeostatic space distribution of T-cell clones from the bone marrow categorized as hyperexpanded/large (>1% frequency of productive rearrangements), medium (0.1-1% frequency), small (more than single event, but less than 0.1% frequency) and rare (single rearrangement events) 6 weeks after the second and third CAR T-cell infusions. (D) Venn diagram of productive CDR3 rearrangements (amino acids) in the peripheral blood before (PRE) and 6 weeks after the first, second and the third CAR T-cell infusions (Inf). (E) Differential abundance based on increasing

or decreasing frequencies of unique TCR $\beta$  CDR3 rearrangements (amino acids) between pre-infusion and post-infusion #1, post-infusion #1 and post-infusion #2 as well as post-infusion #2 and post-infusion #3 samples from the peripheral blood obtained during the initial induction period.

**A.**

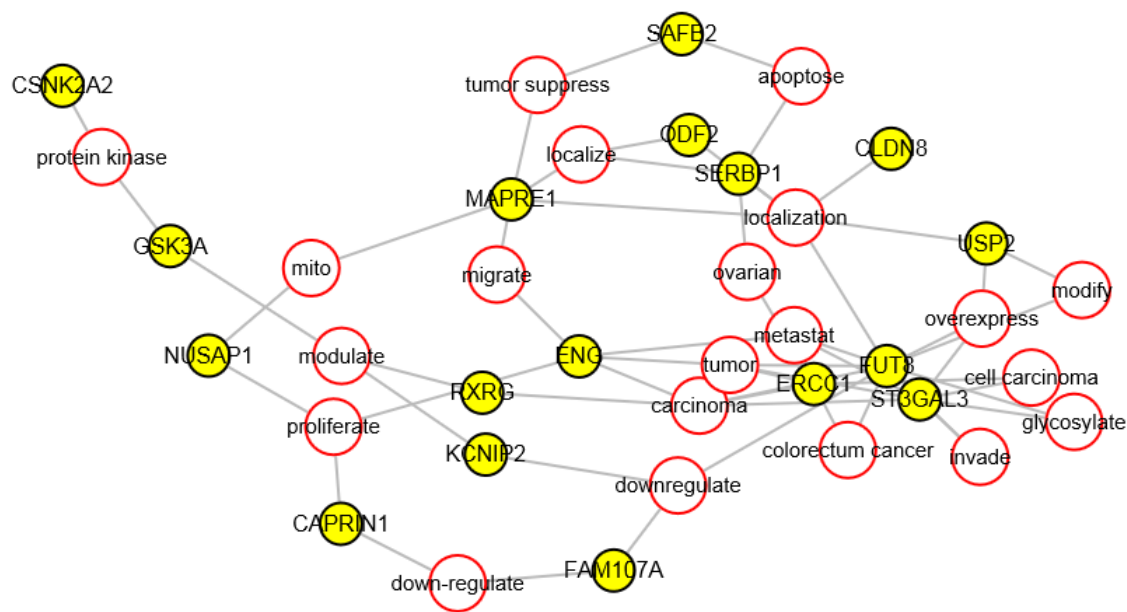

**B.**

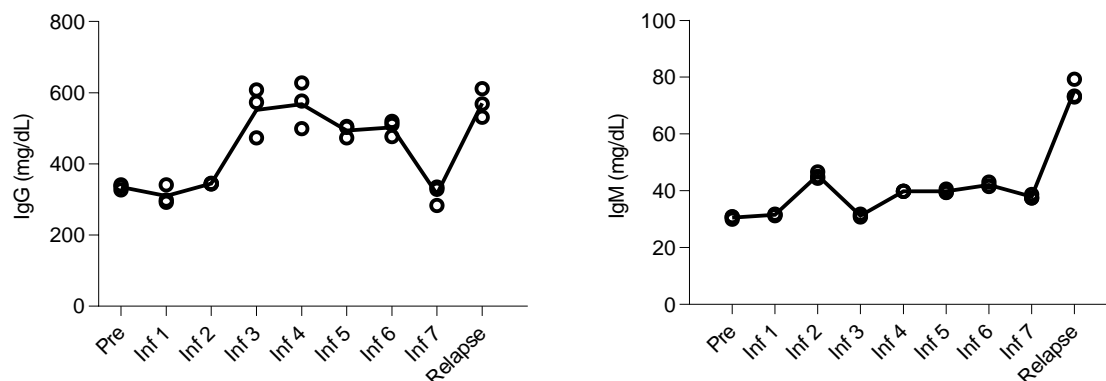

**Supplementary Figure 6: Serum antibody responses identified after HER2 CAR T-cell infusions.**

(A) Cytoscape plot of tumor-related genes analyzed using the WebGIVI tool from the ProtoArray™ Human Protein Microarray results. Yellow shaded circles denote genes and red circles denote functional nodes. (B) Trend in serum IgG and IgM levels determined by indirect ELISA prior to study initiation and during the treatment course (6 weeks after each HER2 CAR T-cell infusion) and at disease recurrence, six months after stopping CAR T-cell infusions. Pre, pre-infusion. Inf, CAR T-cell infusion.

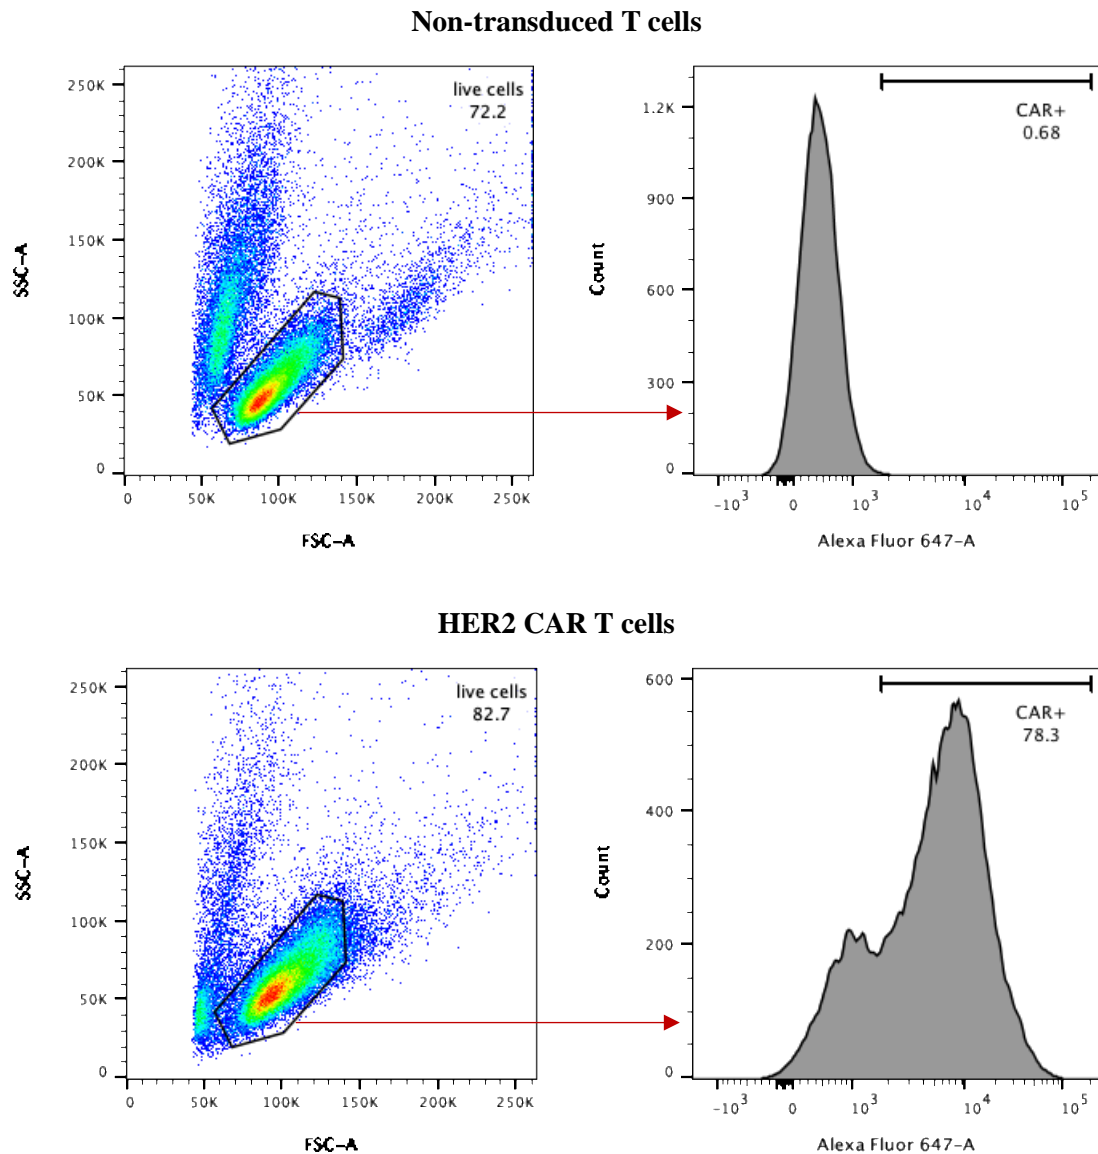

**Supplementary Figure 7: Gating strategy for HER2 CAR transduction on T cells shown in Figure 7D.** Flow cytometry was performed on the patient's T cells at approximately one week after retroviral CAR transduction and repeated prior to product freezing. Histograms shown are representative data. Lower panel demonstrates the gating strategy for evaluating the HER2 CAR expression on patient's T cells in comparison to non-transduced T cells which is shown in the upper panel.

## Supplementary Tables

**Supplementary Table 1.** Summary of the patient's first- and second-line treatment for high-risk rhabdomyosarcoma given according to the Children's Oncology Group (COG) protocols, ARST0431 and ARST0921, respectively.

| Protocol: ARST0431 |                                             |  |                                          |
|--------------------|---------------------------------------------|--|------------------------------------------|
| Agent              | Dose                                        |  | Cycles (in order of administration)      |
| V                  | 1.5mg/m <sup>2</sup> IV x 1                 |  | (IRIN-V) x2                              |
| IRIN               | 50mg/m <sup>2</sup> /day IV x 5             |  | Disease Evaluation                       |
| I                  | 1800 mg/m <sup>2</sup> /day IV x 5          |  | (VDC/IE) x6                              |
| E                  | 100 mg/m <sup>2</sup> /day x 5              |  | Disease Evaluation                       |
| D                  | 37.5 mg/m <sup>2</sup> /day x 2             |  | (IRIN-V/IE/VDC) x6 + XRT to primary site |
| C                  | 1200 mg/m <sup>2</sup> IV x1                |  | Disease Evaluation                       |
| A                  | 0.045 mg/kg IV x 1                          |  | (VAC/IRIN-VCR) x6                        |
|                    |                                             |  |                                          |
| Protocol: ARST0921 |                                             |  |                                          |
| Agent              | Dose                                        |  | Cycles                                   |
| TEMS               | 15 mg/m <sup>2</sup> IV x 3 (days 1, 8, 15) |  | (VINO/C + TEMS) x2                       |
| VINO               | 25 mg/m <sup>2</sup> IV x 2 (days 1, 8)     |  |                                          |
| C                  | 1200 mg/m <sup>2</sup> IV x 1 (day 1)       |  |                                          |

V: Vincristine, IRIN: Irinotecan, I: Ifosfamide, E: Etoposide, D: Doxorubicin, C: Cyclophosphamide, A: Dactinomycin, XRT: Radiotherapy, TEMS: Temsirolimus, VINO: Vinorelbine. MESNA was administered with C and I. PEG-filgrastim was administered with VAC, VD and IE cycles.

**Supplementary Table 2.** Adverse events reported during the first enrollment and study follow up period.

| Adverse Event            | Grade 1            | Grade 2       | Grade 3 | Grade 4       |
|--------------------------|--------------------|---------------|---------|---------------|
| Hematological            |                    |               |         |               |
| Lymphopenia              | C-2                | C-1           | -       | I-1, I-2, I-3 |
| Neutropenia              | -                  | -             | I-1     | I-2, I-3      |
| Leukopenia               | -                  | C-1, C-2, C-4 | -       | I-1, I-2, I-3 |
| Gastrointestinal         |                    |               |         |               |
| Nausea                   | I-3                | -             | -       | -             |
| Vomiting                 | I-3                | -             | -       | -             |
| Elevated AST             | I-3                | -             | -       | -             |
| Elevated alk phos        | I-2, C-1, C-2, C-3 | -             | -       | -             |
| Electrolyte disturbances |                    |               |         |               |
| Hyponatremia             | I-1, I-2, I-3      | -             | -       | -             |
| Constitutional           |                    |               |         |               |
| Fever                    | -                  | I-1, I-2, I-3 | -       | -             |
| Chills                   | I-3                | -             | -       | -             |
| Fatigue                  | I-3                | -             | -       | -             |
| Anorexia                 | I-3                | -             | -       | -             |
| Immunological            |                    |               |         |               |
| CRS                      | I-1, I-2, I-3      | -             | -       | -             |

I: induction cycle, C: consolidation cycle, AST: Aspartate aminotransferase, alk phos: alkaline phosphatase, CRS: cytokine release syndrome

**Supplementary Table 3.** Sample overview of TCR $\beta$  CDR3 survey sequencing.

| Sample                     | Total CDR3<br>Rearrangements | Productive<br>Rearrangements | % Productive<br>Rearrangements | Sample<br>Clonality | Total Nucleated<br>cells | Total T cells | % T cells |
|----------------------------|------------------------------|------------------------------|--------------------------------|---------------------|--------------------------|---------------|-----------|
| HER2 CAR T<br>cell product | 72985                        | 59276                        | 0.81                           | 0.024               | 83424                    | 68328         | 81.90%    |
| PB PRE                     | 12197                        | 9655                         | 0.79                           | 0.195               | 91771                    | 16472         | 17.95%    |
| PB Infusion 1              | 6640                         | 5204                         | 0.78                           | 0.199               | 72413                    | 14523         | 20.06%    |
| PB Infusion 2              | 8707                         | 6899                         | 0.79                           | 0.332               | 86056                    | 25914         | 30.11%    |
| PB<br>Infusion 3           | 6715                         | 5283                         | 0.79                           | 0.331               | 70685                    | 24596         | 34.80%    |
| PB<br>Infusion 4           | 31626                        | 25957                        | 0.80                           | 0.139               | 94076                    | 38680         | 41.11%    |
| PB<br>Infusion 6           | 23906                        | 20055                        | 0.82                           | 0.118               | 80113                    | 26462         | 33.03%    |
| BM Left<br>Infusion 2      | 4871                         | 3856                         | 0.79                           | 0.262               | 141593                   | 10422         | 7.36%     |
| BM Right<br>Infusion 2     | 3382                         | 2682                         | 0.79                           | 0.229               | 109514                   | 6310          | 5.76%     |
| BM Left<br>Infusion 3      | 3175                         | 2560                         | 0.81                           | 0.226               | 87510                    | 6880          | 7.86%     |
| BM Right<br>Infusion 3     | 2592                         | 2041                         | 0.79                           | 0.248               | 71239                    | 6353          | 8.92%     |
| BM Left<br>Infusion 4      | 5643                         | 4591                         | 0.79                           | 0.146               | 139626                   | 7602          | 5.44%     |
| BM Right<br>Infusion 4     | 7082                         | 5761                         | 0.79                           | 0.180               | 116178                   | 10554         | 9.08%     |

TCR, T-cell receptor. CDR3, complementarity determining region 3. PB, peripheral blood. PRE, pre-infusion.  
BM, bone marrow.

**Supplementary Table 4A.** TCR $\beta$  CDR3 length use variation in the peripheral blood (PB) prior to study initiation and at 6 weeks after each HER2 CAR T-cell infusion during the induction of first remission.

| Amino acid | Nucleotide | PB pre-infusion | PB post-infusion 1 | PB post-infusion 2 | PB post-infusion 3 |
|------------|------------|-----------------|--------------------|--------------------|--------------------|
| 7          | 21         | 0.011%          | 0.013%             | 0.011%             | 0.011%             |
| 8          | 24         | 0.011%          | 0.019%             | 0.011%             | 0.000%             |
| 9          | 27         | 0.061%          | 0.025%             | 0.025%             | 0.041%             |
| 10         | 30         | 0.322%          | 0.361%             | 0.304%             | 0.201%             |
| 11         | 33         | 1.853%          | 1.129%             | 1.140%             | 1.088%             |
| 12         | 36         | 17.739%         | 11.883%            | 5.517%             | 13.599%            |
| 13         | 39         | 14.593%         | 16.278%            | 9.731%             | 11.424%            |
| 14         | 42         | 16.330%         | 21.712%            | 20.345%            | 15.067%            |
| 15         | 45         | 25.291%         | 21.313%            | 16.059%            | 21.466%            |
| 16         | 48         | 11.664%         | 16.804%            | 33.295%            | 25.120%            |
| 17         | 51         | 5.410%          | 5.954%             | 9.087%             | 7.770%             |
| 18         | 54         | 2.969%          | 1.909%             | 1.770%             | 1.453%             |
| 19         | 57         | 3.046%          | 1.604%             | 0.695%             | 1.702%             |
| 20         | 60         | 0.427%          | 0.881%             | 1.857%             | 0.972%             |
| 21         | 63         | 0.178%          | 0.082%             | 0.101%             | 0.063%             |
| 22         | 66         | 0.061%          | 0.032%             | 0.015%             | 0.004%             |
| 23         | 69         | 0.022%          | 0.000%             | 0.025%             | 0.011%             |
| 24         | 72         | 0.011%          | 0.000%             | 0.007%             | 0.007%             |
| 25         | 75         | 0.000%          | 0.000%             | 0.000%             | 0.000%             |
| 26         | 78         | 0.000%          | 0.000%             | 0.004%             | 0.000%             |

**Supplementary Table 4B.** TCR $\beta$ V family gene use in the CDR3 region of peripheral blood (PB) T cells before and 6 weeks after the first, second and third HER2 CAR T-cell infusions.

| TCRB V Gene      | PB pre-infusion | PB post-infusion 1 | PB post-infusion 2 | PB post-infusion 3 |
|------------------|-----------------|--------------------|--------------------|--------------------|
| --               | 0.1054%         | 0.0444%            | 0.072%             | 0.022%             |
| TCRBV01-01       | 0.0333%         | 0.0190%            | 0.065%             | 0.011%             |
| TCRBV02-01       | 3.6455%         | 8.0342%            | 13.482%            | 9.401%             |
| TCRBV03-01/03-02 | 2.7633%         | 2.5491%            | 1.350%             | 1.140%             |
| TCRBV04-01       | 1.5648%         | 1.5282%            | 1.220%             | 1.520%             |
| TCRBV04-02       | 0.7657%         | 0.6341%            | 0.492%             | 0.216%             |
| TCRBV05          | 0.0055%         | 0.0000%            | 0.007%             | 0.004%             |
| TCRBV05-01       | 3.9785%         | 3.0691%            | 2.140%             | 2.183%             |
| TCRBV05-03       | 1.831%          | 0.0507%            | 0.047%             | 0.019%             |
| TCRBV05-04       | 1.8311%         | 1.9087%            | 1.151%             | 1.114%             |
| TCRBV05-05       | 2.4359%         | 3.7032%            | 2.947%             | 1.088%             |
| TCRBV05-06       | 1.8255%         | 1.9341%            | 1.068%             | 1.114%             |
| TCRBV05-07       | 0.0000%         | 0.0127%            | 0.011%             | 0.004%             |
| TCRBV05-08       | 0.4217%         | 0.3044%            | 0.206%             | 0.253%             |
| TCRBV06          | 1.2152%         | 1.0780%            | 0.702%             | 0.566%             |
| TCRBV06-01       | 1.5148%         | 1.5916%            | 3.030%             | 3.974%             |
| TCRBV06-02       | 0.1554%         | 0.1712%            | 0.062%             | 0.063%             |
| TCRBV06-02/06-03 | 0.4051%         | 0.3614%            | 0.167%             | 0.183%             |
| TCRBV06-04       | 0.5216%         | 0.1902%            | 0.337%             | 0.168%             |
| TCRBV06-05       | 5.0938%         | 6.7280%            | 5.600%             | 12.266%            |
| TCRBV06-06       | 2.6912%         | 1.3063%            | 0.612%             | 1.240%             |
| TCRBV06-07       | 0.0166%         | 0.0127%            | 0.004%             | 0.007%             |
| TCRBV06-08       | 0.0000%         | 0.0127%            | 0.007%             | 0.007%             |
| TCRBV06-09       | 0.0055%         | 0.0000%            | 0.011%             | 0.007%             |
| TCRBV07          | 0.1776%         | 0.1268%            | 0.087%             | 0.652%             |
| TCRBV07-02       | 0.8268%         | 0.9956%            | 0.786%             | 0.685%             |
| TCRBV07-03       | 1.0820%         | 2.2955%            | 1.658%             | 0.756%             |
| TCRBV07-04       | 0.0111%         | 0.0190%            | 0.015%             | 0.015%             |
| TCRBV07-05       | 0.0166%         | 0.0063%            | 0.011%             | 0.000%             |
| TCRBV07-06       | 1.0765%         | 0.4883%            | 0.460%             | 0.358%             |
| TCRBV07-07       | 0.0721%         | 0.0888%            | 0.051%             | 0.045%             |
| TCRBV07-08       | 1.0043%         | 0.8180%            | 0.442%             | 0.328%             |
| TCRBV07-09       | 3.2405%         | 2.8155%            | 3.526%             | 2.194%             |
| TCRBV09-01       | 10.0821%        | 6.2841%            | 2.878%             | 1.680%             |
| TCRBV10-01       | 0.4217%         | 0.5073%            | 0.253%             | 0.231%             |
| TCRBV10-02       | 9.9046%         | 1.7945%            | 0.833%             | 1.233%             |
| TCRBV10-03       | 1.2041%         | 0.9131%            | 1.090%             | 0.894%             |
| TCRBV11          | 1.4149%         | 0.8687%            | 1.014%             | 0.700%             |
| TCRBV11-01       | 0.2275%         | 0.1966%            | 0.120%             | 0.402%             |
| TCRBV11-02       | 0.1165%         | 0.1395%            | 0.138%             | 0.082%             |
| TCRBV11-03       | 0.3385%         | 0.4058%            | 0.319%             | 0.428%             |
| TCRBV12          | 2.2694%         | 2.9930%            | 1.730%             | 4.641%             |
| TCRBV12-01       | 0.0444%         | 0.0063%            | 0.011%             | 0.000%             |
| TCRBV12-02       | 0.0277%         | 0.0634%            | 0.076%             | 0.071%             |
| TCRBV12-03/12-04 | 3.3237%         | 3.1516%            | 2.125%             | 0.883%             |
| TCRBV12-05       | 0.3052%         | 0.2093%            | 0.221%             | 0.164%             |
| TCRBV13-01       | 1.1541%         | 1.8389%            | 0.778%             | 1.021%             |
| TCRBV14-01       | 2.9519%         | 2.1560%            | 0.959%             | 0.373%             |
| TCRBV15-01       | 0.9988%         | 0.7483%            | 0.634%             | 1.237%             |
| TCRBV16-01       | 0.1665%         | 0.2156%            | 0.109%             | 0.045%             |

|            |         |          |         |         |
|------------|---------|----------|---------|---------|
| TCRBV18-01 | 1.4038% | 1.7819%  | 1.220%  | 0.998%  |
| TCRBV19-01 | 4.3891% | 4.1725%  | 3.001%  | 3.039%  |
| TCRBV20    | 4.2171% | 5.1617%  | 5.083%  | 3.863%  |
| TCRBV20-01 | 0.4772% | 0.4566%  | 0.362%  | 0.298%  |
| TCRBV21-01 | 0.6548% | 0.3805%  | 0.261%  | 0.235%  |
| TCRBV23-01 | 0.7269% | 0.3614%  | 0.196%  | 0.075%  |
| TCRBV24-01 | 1.3539% | 1.7945%  | 1.238%  | 1.985%  |
| TCRBV25    | 0.0111% | 0.0000%  | 0.015%  | 0.007%  |
| TCRBV25-01 | 0.5216% | 0.3678%  | 0.395%  | 0.928%  |
| TCRBV27-01 | 6.8416% | 13.1706% | 18.195% | 18.568% |
| TCRBV28-01 | 3.7232% | 4.6734%  | 13.554% | 13.327% |
| TCRBV29-01 | 1.0154% | 1.5409%  | 0.873%  | 0.354%  |
| TCRBV30-01 | 1.0154% | 0.7483%  | 0.500%  | 0.637%  |
| TCRBVA-01  | 0.0111% | 0.0000%  | 0.000%  | 0.000%  |

**Supplementary Table 4C.** TCR $\beta$ J family gene use in the CDR3 region of peripheral blood (PB) T cells before and 6 weeks after the first, second and third HER2 CAR T-cell infusions.

| TCR $\beta$ J gene | PB pre-infusion | PB post-infusion 1 | PB post-infusion 2 | PB post-infusion 3 |
|--------------------|-----------------|--------------------|--------------------|--------------------|
| TCRBJ01-01         | 9.333           | 12.505             | 24.635             | 27.240             |
| TCRBJ01-02         | 22.717          | 19.854             | 10.795             | 10.232             |
| TCRBJ01-03         | 2.708           | 2.422              | 1.390              | 1.252              |
| TCRBJ01-04         | 2.075           | 2.055              | 2.053              | 1.948              |
| TCRBJ01-05         | 4.206           | 3.805              | 3.211              | 2.682              |
| TCRBJ01-06         | 10.138          | 5.663              | 2.313              | 5.639              |
| TCRBJ02            | 0.039           | 0.032              | 0.025              | 0.000              |
| TCRBJ02-01         | 9.927           | 16.157             | 16.081             | 13.923             |
| TCRBJ02-02         | 7.008           | 6.119              | 4.554              | 5.718              |
| TCRBJ02-03         | 6.403           | 7.571              | 10.730             | 6.619              |
| TCRBJ02-04         | 0.744           | 0.704              | 0.724              | 0.361              |
| TCRBJ02-05         | 7.962           | 7.495              | 6.154              | 4.567              |
| TCRBJ02-06         | 1.226           | 1.205              | 1.216              | 0.484              |
| TCRBJ02-07         | 15.514          | 14.413             | 16.117             | 19.335             |

**Supplementary Table 5A.** List of hyperexpanded (>1% frequency) TCR $\beta$  CDR3 rearrangements present in peripheral blood (PB) during pre-infusion and their fate during the HER2 CAR T-cell induction period.

| CDR3 sequence       | Sum (Productive PB Pre-infusion Frequency) | PB Infusion 1 | PB Infusion 2 | PB Infusion 3 |       |
|---------------------|--------------------------------------------|---------------|---------------|---------------|-------|
| CASSDDDSRYTF        | 10.674%                                    | 9.23%         | 1.40%         | 0.04%         | 0.01% |
| CASSVEGAENSPLHF     | 12.004%                                    | 7.43%         | 3.40%         | 0.84%         | 0.34% |
| CASSPRTSGGLTNTGELFF | 3.957%                                     | 2.09%         | 0.83%         | 0.05%         | 0.98% |
| CASSQDRGNEQYF       | 3.717%                                     | 2.06%         | 1.22%         | 0.35%         | 0.07% |
| CASRVGQDYGYTF       | 6.333%                                     | 1.88%         | 2.45%         | 1.50%         | 0.50% |
| CASSLSPGPVGTQYF     | 2.332%                                     | 1.54%         | 0.66%         | 0.09%         | 0.04% |
| CASSSANYGYTF        | 1.979%                                     | 1.43%         | 0.46%         | 0.04%         | 0.04% |

**Supplementary Table 5B.** Tracking of hyperexpanded (>1% frequency) TCR $\beta$  CDR3 rearrangements in peripheral blood (PB) during induction phase following HER2 CAR T-cell infusions.

| CDR3 sequence        | Sum<br>(Productive<br>Frequency) | PB Pre-infusion | PB Infusion 1 | PB Infusion 2 | PB Infusion 3 |
|----------------------|----------------------------------|-----------------|---------------|---------------|---------------|
| CASSLGGSYNEQFF       | 17.09%                           | 0.90%           | 6.02%         | 7.35%         | 2.82%         |
| CASSTPGQEGTDTQYF     | 12.86%                           | 0.16%           | 2.21%         | 6.89%         | 3.62%         |
| CASSGRDWDTVNTEAFF    | 6.40%                            | 0.69%           | 2.09%         | 2.86%         | 0.76%         |
| CASGWLTSSMNTEAFF     | 16.41%                           | 0.00%           | 1.67%         | 9.28%         | 5.45%         |
| CASSSANYGYTF         | 2.23%                            | 0.60%           | 1.44%         | 0.04%         | 0.14%         |
| CASSLLTTSSEYEQYF     | 8.94%                            | 0.37%           | 1.40%         | 4.34%         | 2.83%         |
| CASSFGGNDPRRYTF      | 2.29%                            | 0.32%           | 1.20%         | 0.49%         | 0.28%         |
| CASSLDHRELFF         | 1.84%                            | 0.00%           | 1.14%         | 0.67%         | 0.02%         |
| CASSYSSGGNTEAFF      | 12.38%                           | 0.16%           | 0.35%         | 2.18%         | 9.70%         |
| CASSGLSGETMNTEAFF    | 2.31%                            | 0.03%           | 0.42%         | 1.69%         | 0.17%         |
| CSARVPGLAGGTTGAQTQYF | 3.10%                            | 0.04%           | 0.54%         | 1.69%         | 0.84%         |
| CASSGLEGTMMNTEAFF    | 5.72%                            | 0.06%           | 0.06%         | 1.68%         | 3.93%         |
| CASSSLPTGLAYEQYF     | 4.34%                            | 0.01%           | 0.08%         | 1.63%         | 2.62%         |
| CASSFGGTYNEQFF       | 2.37%                            | 0.00%           | 0.62%         | 1.46%         | 0.30%         |
| CASSELDTSLSYEQYF     | 3.88%                            | 0.17%           | 0.49%         | 1.40%         | 1.83%         |
| CASSLGLAPLHF         | 3.81%                            | 0.00%           | 0.00%         | 0.01%         | 3.80%         |
| CASSVRGNYGYTF        | 2.38%                            | 0.00%           | 0.00%         | 0.00%         | 2.38%         |
| CASSLGSGGALYGYTF     | 2.14%                            | 0.00%           | 0.00%         | 0.00%         | 2.14%         |
| CASRTSSNEQFF         | 1.80%                            | 0.00%           | 0.00%         | 0.00%         | 1.80%         |
| CASRTGPNEQYF         | 1.41%                            | 0.00%           | 0.00%         | 0.00%         | 1.41%         |

**Supplementary Table 6.** Complete list of proteins eliciting increased signal from serum autoantibody binding ( $\geq 2$  fold) in the patient's serum at various post HER2 CAR T-cell infusion time points (6 weeks after infusion 1, 2 and 3) compared to pre-infusion (4 weeks after standard chemotherapy but prior to study initiation) time point in Human Protein Microarray.

| Data Base ID   | Description                                                                                                                   | Gene symbol      | Fold change from pre-infusion |                         |                         |
|----------------|-------------------------------------------------------------------------------------------------------------------------------|------------------|-------------------------------|-------------------------|-------------------------|
|                |                                                                                                                               |                  | Infusion 1<br>(Day 43)        | Infusion 2<br>(Day 120) | Infusion 3<br>(Day 197) |
| BC002955.1     | ubiquitin specific peptidase 2                                                                                                | <i>USP2</i>      | 27                            | 11.3                    | 6.1                     |
| NM_177403.3    | RAB7B, member RAS oncogene family                                                                                             | <i>RAB7B</i>     | 10.7                          | 8.1                     | 4.2                     |
| NM_178154.1    | fucosyltransferase 8 (alpha (1,6) fucosyl-transferase), transcript variant 2                                                  | <i>FUT8</i>      | 3.7                           | 3.7                     | 2.5                     |
| BC010895.1     | sulfotransferase family, cytosolic, 1B, member 1                                                                              | <i>SULT1B1</i>   | 2.2                           | 2.9                     | 2.8                     |
| BC017070.1     | clusterin associated protein 1                                                                                                | <i>CLUAP1</i>    |                               | 38.3                    | 54.6                    |
| BC032347.1     | chromosome 8 ORF 59                                                                                                           | <i>C8ORF59</i>   |                               | 12.1                    | 6.4                     |
|                | CCP_10BSA                                                                                                                     | <i>CCP-10BSA</i> |                               | 6.4                     | 6.4                     |
|                | CCP_1BSA                                                                                                                      | <i>CCP_1BSA</i>  |                               | 5.2                     | 4.2                     |
| NM_174972.1    | CMP-N-acetylneuraminate-beta-1,4-galactoside alpha-2,3-sialyltransferase                                                      | <i>ST3GAL3</i>   |                               | 3.8                     | 6.9                     |
| NM_019884.2    | glycogen synthase kinase 3 alpha                                                                                              | <i>GSK3A</i>     | 67.8                          | 31.8                    |                         |
| XM_378678.1    | PREDICTED: Homo sapiens hypothetical                                                                                          | <i>LOC400600</i> | 27.2                          | 12.4                    |                         |
| NM_016484.1    | PDZ domain containing 11                                                                                                      | <i>PDZD11</i>    | 18.6                          |                         |                         |
| BC025279.1     | Scaffold attachment factor                                                                                                    | <i>SAFB2</i>     | 9.4                           |                         |                         |
| NM_001023.2    | ribosomal protein S20                                                                                                         | <i>RPS20</i>     | 8.6                           |                         |                         |
| NM_001896.1    | Casein kinase 2, alpha prime polypeptide, mRNA                                                                                | <i>CSNK2A2</i>   | 6                             |                         |                         |
| BC014271.2     | endoglin (Osler-Rendu-Weber syndrome 1)                                                                                       | <i>ENG</i>       | 5.5                           |                         |                         |
| NM_001025100.1 | Myelin basic protein                                                                                                          | <i>MBP</i>       | 5.4                           |                         |                         |
| BC033219.1     | Leucine zipper protein 1, mRNA (cDNA clone IMAGE:5017908) complete cds                                                        | <i>LUZP1</i>     | 4.8                           |                         |                         |
| NP_002497.2    | B-NGF / Beta-NGF Protein (Native)                                                                                             | <i>NGF</i>       | 4.3                           |                         |                         |
| BC010629.1     | outer dense fiber of sperm tails 2                                                                                            | <i>ODF2</i>      | 3.4                           |                         |                         |
| NM_024695.1    | lectin, mannose-binding, 1 like                                                                                               | <i>LMAN1L</i>    | 3.3                           |                         |                         |
| BC012109.1     | homer scaffolding protein 2                                                                                                   | <i>HOMER2</i>    | 3                             |                         |                         |
| NM_006917.3    | Retinoic acid receptor RXR-gamma                                                                                              | <i>RXRG</i>      | 2.5                           |                         |                         |
| NM_002055.1    | glial fibrillary acidic protein                                                                                               | <i>GFAP</i>      | 2.2                           |                         |                         |
| NM_015640.1    | SERPINE1 mRNA binding protein 1, transcript variant 4                                                                         | <i>SERBP1</i>    | 2.2                           |                         |                         |
| NM_016359.2    | Nucleolar and spindle associated protein 1, transcript variant 1, mRNA                                                        | <i>NUSAP1</i>    |                               | 9.7                     |                         |
| NM_001003396.1 | tumor protein D52-like 1, transcript variant 3                                                                                | <i>TPD52L1</i>   |                               | 4.8                     |                         |
| NM_015975.3    | TAF9B RNA polymerase II, TATA box binding protein (TBP)-associated factor, 31kDa                                              | <i>TAF9B</i>     |                               | 4.3                     |                         |
| NM_002608.1    | platelet-derived growth factor beta polypeptide (simian sarcoma viral (v-sis) oncogene homolog) (PDGFB), transcript variant 1 | <i>PDGFB</i>     |                               | 2.3                     |                         |
| NM_005898.4    | cell cycle associated protein 1, transcript variant 1                                                                         | <i>CAPRIN1</i>   |                               | 2.1                     |                         |
| NM_012325.1    | microtubule-associated protein, RP/EB family, member 1                                                                        | <i>MAPRE1</i>    |                               | 2                       |                         |
| NM_199328.1    | Claudin 8                                                                                                                     | <i>CLDN8</i>     |                               | 2                       |                         |
| NM_173191.2    | Kv channel interacting protein 2, transcript variant 2                                                                        | <i>KCNIP2</i>    |                               |                         | 223.3                   |
| NM_006147.1    | interferon regulatory factor 6                                                                                                | <i>IRF6</i>      |                               |                         | 168                     |
| NM_018107.2    | RNA binding motif protein 23, transcript variant 2                                                                            | <i>RBM23</i>     |                               |                         | 97.6                    |

|             |                                                                                       |                 |  |  |      |
|-------------|---------------------------------------------------------------------------------------|-----------------|--|--|------|
| BC024208.1  | RNA binding motif protein 23                                                          | <i>RBM23</i>    |  |  | 73.1 |
| BC009348.2  | cirrhosis, autosomal recessive 1A (cirhin)                                            | <i>CIRH1A</i>   |  |  | 9.7  |
| NM_153207.2 | AE binding protein 2                                                                  | <i>AEBP2</i>    |  |  | 9.1  |
| BC052813.1  | Excision repair cross-complementing rodent repair deficiency, complementation group 1 | <i>ERCC1</i>    |  |  | 7.1  |
| NM_199124.1 | chromosome 11 open reading frame 63 (C11orf63), transcript variant 2                  | <i>C11orf63</i> |  |  | 5.6  |
| BC080187.1  | Leiomodin-1                                                                           | <i>LMOD-1</i>   |  |  | 4.1  |
| BC001755.1  | Leiomodin-1                                                                           | <i>LMOD-1</i>   |  |  | 3.7  |

**Supplementary Table 7.** Proteins consistently eliciting increased signal from serum autoantibody binding ( $\geq 2$  fold) detected 6 weeks after the first, second and third infusions, their localization, and pathology association.

| Gene ID        | Description                                                                  | Cellular Localization <sup>1,2</sup>      | Pathology Association                                                                                                                                                                                                                                             |
|----------------|------------------------------------------------------------------------------|-------------------------------------------|-------------------------------------------------------------------------------------------------------------------------------------------------------------------------------------------------------------------------------------------------------------------|
| <i>FUT8</i>    | Fucosyltransferase 8 (alpha (1,6) fucosyl-transferase), transcript variant 2 | Cytosol, plasma membrane                  | Promotes breast cancer cell invasiveness <sup>3</sup> , melanoma metastasis <sup>4</sup> , overexpressed in aggressive prostate cancer <sup>5</sup>                                                                                                               |
| <i>USP2</i>    | Ubiquitin specific peptidase 2                                               | Golgi apparatus, nucleoplasm              | Promotes cell migration and invasion in Triple negative breast cancer <sup>6</sup> , colorectal cancer and mantle cell lymphoma models <sup>7</sup> , enhances tumor progression in bladder cancer <sup>8</sup>                                                   |
| <i>SULT1B1</i> | Sulfotransferase family, cytosolic, 1B, member 1                             | Cytosol, Golgi apparatus, plasma membrane | Expressed in colorectal cancer with copy number aberrations <sup>9</sup>                                                                                                                                                                                          |
| <i>RAB7B</i>   | <i>RAB7B</i> member, <i>RAS</i> oncogene family                              | Cytosol                                   | Unfavorable prognostic marker in endometrial cancer <sup>1</sup> , monocytic differentiation of human acute promyelocytic leukemia cells <sup>10</sup> , interacts directly with myosin II and influences cell adhesion, polarization and migration <sup>11</sup> |

## Supplementary References

1. Uhlen M, Zhang C, Lee S, et al. A pathology atlas of the human cancer transcriptome. *Science* 2017;357.
2. UniProt Consortium T. UniProt: the universal protein knowledgebase. *Nucleic acids research* 2018;46:2699.
3. Tu CF, Wu MY, Lin YC, Kannagi R, Yang RB. FUT8 promotes breast cancer cell invasiveness by remodeling TGF-beta receptor core fucosylation. *Breast cancer research : BCR* 2017;19:111.
4. Agrawal P, Fontanals-Cirera B, Sokolova E, et al. A Systems Biology Approach Identifies FUT8 as a Driver of Melanoma Metastasis. *Cancer cell* 2017;31:804-19 e7.
5. Wang X, Chen J, Li QK, et al. Overexpression of alpha (1,6) fucosyltransferase associated with aggressive prostate cancer. *Glycobiology* 2014;24:935-44.
6. Qu Q, Mao Y, Xiao G, et al. USP2 promotes cell migration and invasion in triple negative breast cancer cell lines. *Tumour biology : the journal of the International Society for Oncodevelopmental Biology and Medicine* 2015;36:5415-23.
7. Davis MI, Pragani R, Fox JT, et al. Small Molecule Inhibition of the Ubiquitin-specific Protease USP2 Accelerates cyclin D1 Degradation and Leads to Cell Cycle Arrest in Colorectal Cancer and Mantle Cell Lymphoma Models. *The Journal of biological chemistry* 2016;291:24628-40.
8. Kim J, Kim WJ, Liu Z, Loda M, Freeman MR. The ubiquitin-specific protease USP2a enhances tumor progression by targeting cyclin A1 in bladder cancer. *Cell cycle* 2012;11:1123-30.
9. Yoshida T, Kobayashi T, Itoda M, et al. Clinical omics analysis of colorectal cancer incorporating copy number aberrations and gene expression data. *Cancer informatics* 2010;9:147-61.
10. Yang M, Chen T, Han C, Li N, Wan T, Cao X. Rab7b, a novel lysosome-associated small GTPase, is involved in monocytic differentiation of human acute promyelocytic leukemia cells. *Biochemical and biophysical research communications* 2004;318:792-9.
11. Borg M, Bakke O, Progida C. A novel interaction between Rab7b and actomyosin reveals a dual role in intracellular transport and cell migration. *Journal of cell science* 2014;127:4927-39.
